# Supplementary material for: Evaluating sample normalization methods for MS-based multi-omics and the application to a neurodegenerative mouse model
Source: Royal Society of Chemistry journal article supplement (doi:10.1039/d4an01573h), 2025-01-01
Supplement: d4an01573h1.pdf [file d4an01573h1.pdf]

## Supporting Information

### **Evaluating Sample Normalization Methods for MS-based Multi-omics and the Application to a Neurodegenerative Mouse Model**

Gwang Bin Lee<sup>1</sup>, Cha Yang<sup>2</sup>, Fenghua Hu<sup>2</sup>, and Ling Hao<sup>1\*</sup>

<sup>1</sup>Department of Chemistry & Biochemistry, University of Maryland, College Park, MD, 20742.

<sup>2</sup>Department of Molecular Biology and Genetics, Weill Institute for Cell and Molecular Biology,  
Cornell University, Ithaca, NY 14853, USA

\*Corresponding author

Ling Hao

Associate Professor

Department of Chemistry and Biochemistry

University of Maryland

E-mail: [linghao1@umd.edu](mailto:linghao1@umd.edu)

## TABLE OF CONTENTS

- **Table S1.** The list of internal standards for lipidomics and metabolomics.
- **Fig. S1.** Example LC-MS chromatograms from (A) proteomics, (B) lipidomics, and (C) metabolomics for mouse brain.
- **Fig. S2.** Volcano plots showing the influence of normalization methods on lipidomics.
- **Fig. S3.** Volcano plots showing the influence of normalization methods on metabolomics.
- **Fig. S4.** Example lipid concentrations measured from *GRN* KO vs. WT mouse brains.
- **Supplementary Data (Excel).** The complete datasets for quantitative proteomics, lipidomics and metabolomics in three different sample normalization methods and *GRN* KO mouse brain.

**Table S1.** The spiked internal standards for lipidomics and metabolomics and their concentration.

| Category     | Compound name                                             | Adduct                                   | <i>m/z</i>           | Spiked conc. (nmol/mL) |
|--------------|-----------------------------------------------------------|------------------------------------------|----------------------|------------------------|
| Lipidomics   | SM (d18:1/18:1-d9)                                        | [M+H] <sup>+</sup>                       | 738.6475             | 18.1                   |
| Lipidomics   | Cer (d18:1-d7/15:0)                                       | [M+H] <sup>+</sup>                       | 531.5465             | 25.1                   |
| Lipidomics   | MG (18:1-d7)                                              | [M+NH <sub>4</sub> ] <sup>+</sup>        | 381.3704             | 36.7                   |
| Lipidomics   | DG (15:0/18:1-d7)                                         | [M+NH <sub>4</sub> ] <sup>+</sup>        | 605.5849             | 22.7                   |
| Lipidomics   | LPC (18:1-d7)                                             | [M+H] <sup>+</sup>                       | 529.3998             | 25.2                   |
| Lipidomics   | LPE (18:1-d7)                                             | [M+H] <sup>+</sup>                       | 487.3529             | 27.4                   |
| Lipidomics   | TG (15:0/18:1-d7/15:0)                                    | [M+NH <sub>4</sub> ] <sup>+</sup>        | 829.7989             | 16.4                   |
| Lipidomics   | CE (18:1-d7)                                              | [M+NH <sub>4</sub> ] <sup>+</sup>        | 675.6780             | 20.3                   |
| Lipidomics   | PC (15:0/18:1-d7)                                         | [M+H] <sup>+</sup>                       | 753.6138             | 17.7                   |
| Lipidomics   | PE (15:0/18:1-d7)                                         | [M+H] <sup>+</sup>                       | 711.5669             | 18.8                   |
| Lipidomics   | PG (15:0/18:1-d7)                                         | [M-H] <sup>-</sup>                       | 740.5469             | 17.5                   |
| Lipidomics   | PS (15:0/18:1-d7)                                         | [M-H] <sup>-</sup>                       | 753.5422             | 17.2                   |
| Lipidomics   | PI (15:0/18:1-d7)                                         | [M-H] <sup>-</sup>                       | 828.5630             | 15.7                   |
| Metabolomics | <sup>13</sup> C <sub>5</sub> , <sup>15</sup> N folic acid | [M+H] <sup>+</sup><br>[M-H] <sup>-</sup> | 448.1613<br>446.1462 | 51.4                   |

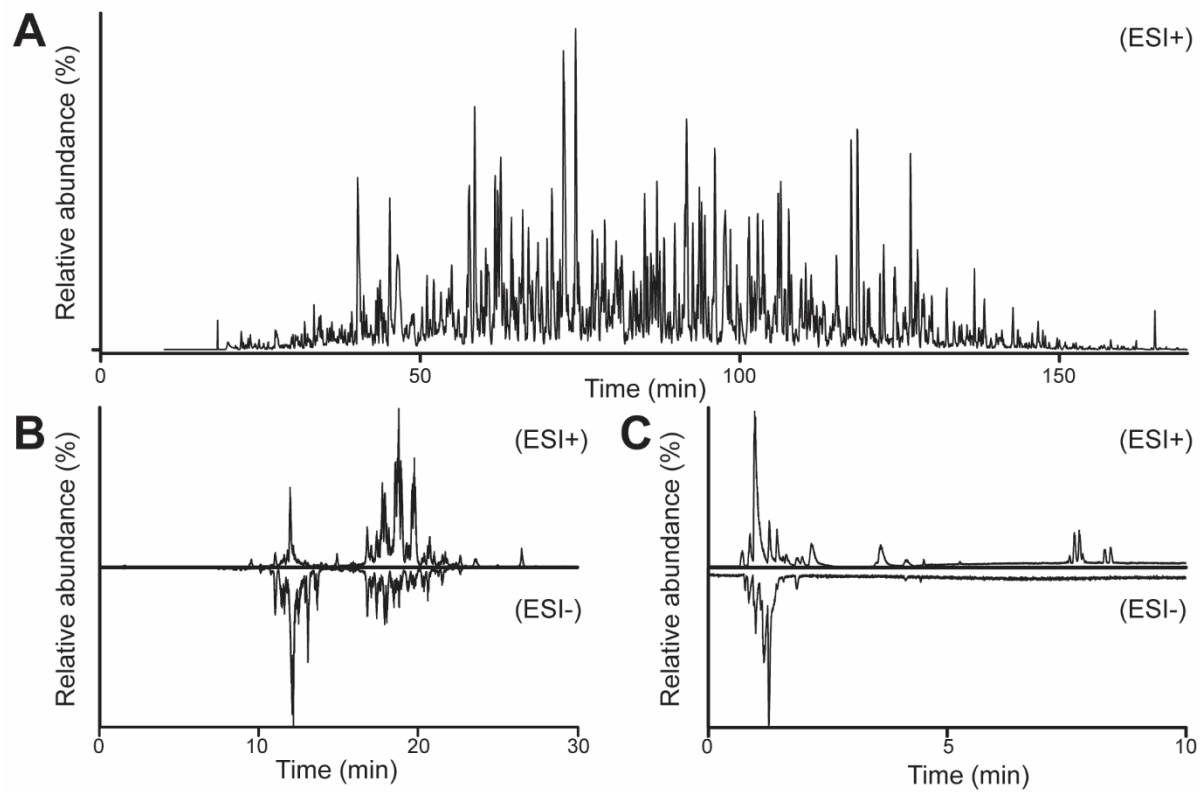

**Fig. S1.** Example LC-MS chromatograms from (A) proteomics, (B) lipidomics, and (C) metabolomics from mouse brain tissue.

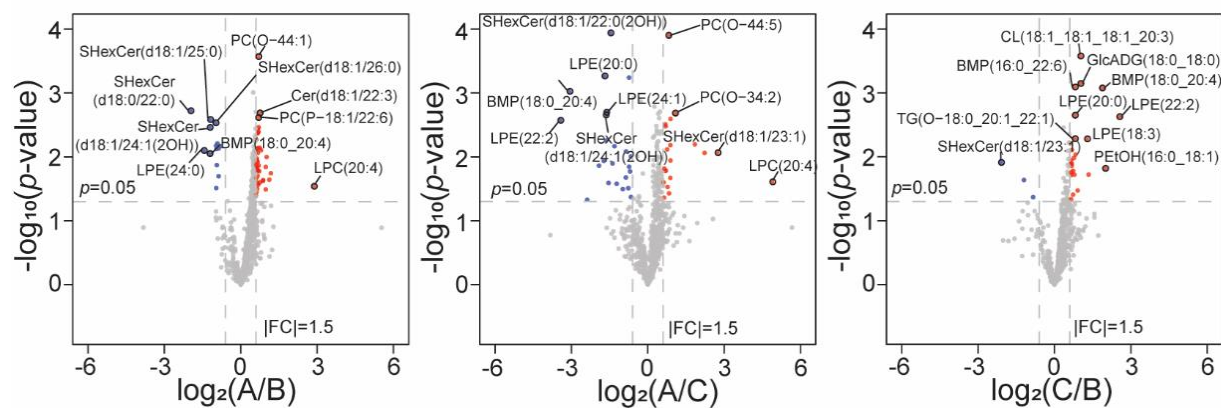

**Fig. S2.** Volcano plots showing the influence of normalization methods on lipidomics. A, B, C represents three different normalization methods.

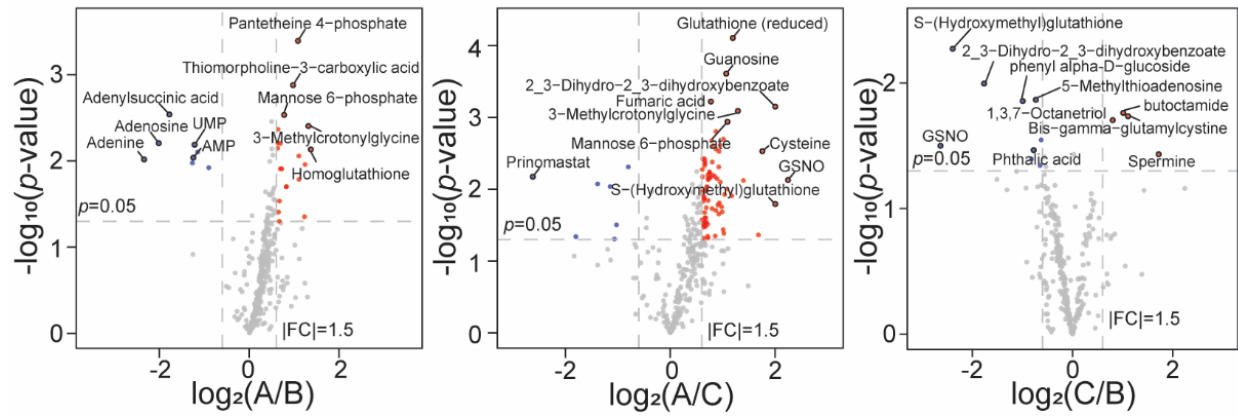

**Fig. S3.** Volcano plots showing the influence of normalization methods on metabolomics.

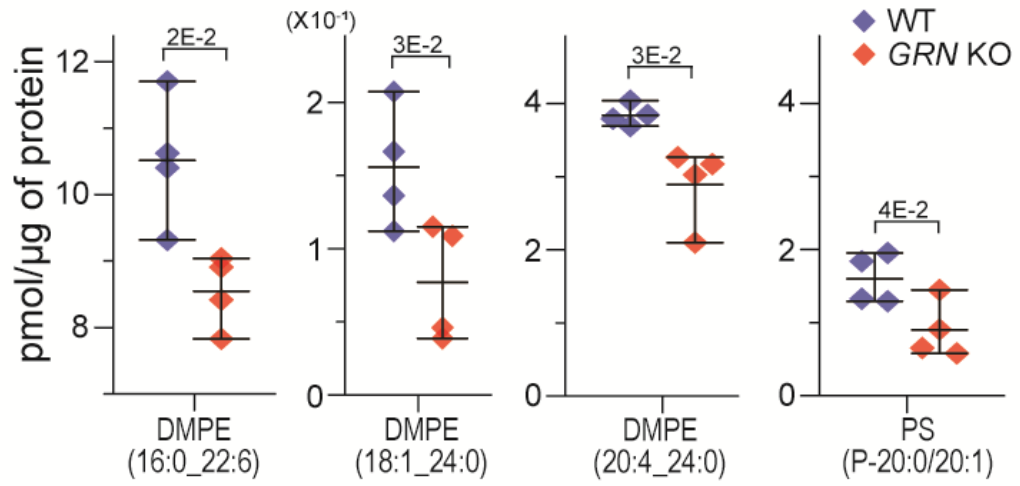

**Fig. S4.** Example lipid concentrations measured from *GRN* KO vs. WT mouse brains.
